# Supplementary material for: Microwave-assisted hydrothermal solution process for accelerated formation of 3D hierarchical flowery anatase-TiO2 microspheres with excellent photocatalytic activity
Source: Royal Society of Chemistry journal article supplement (doi:10.1039/d3ce00872j), 2023-01-01
Supplement: d3ce00872j1.pdf [file d3ce00872j1.pdf]

### Electronic Supplementary Information (ESI)

| No. | h | k | l | d [Å]   | 2 $\theta$ [°] | I [%] |
|-----|---|---|---|---------|----------------|-------|
| 1   | 0 | 1 | 1 | 3.52213 | 25.266         | 100.0 |
| 2   | 0 | 1 | 3 | 2.42317 | 37.071         | 6.0   |
| 3   | 0 | 0 | 4 | 2.36100 | 38.084         | 18.5  |
| 4   | 1 | 1 | 2 | 2.33352 | 38.550         | 7.5   |
| 5   | 0 | 2 | 0 | 1.89800 | 47.889         | 26.5  |
| 6   | 0 | 2 | 2 | 1.76106 | 51.877         | 0.0   |
| 7   | 0 | 1 | 5 | 1.69103 | 54.197         | 16.2  |
| 8   | 1 | 2 | 1 | 1.67084 | 54.906         | 16.5  |
| 9   | 1 | 2 | 3 | 1.49420 | 62.065         | 2.7   |
| 10  | 0 | 2 | 4 | 1.47927 | 62.762         | 11.9  |
| 11  | 1 | 1 | 6 | 1.35777 | 69.128         | 5.5   |
| 12  | 2 | 2 | 0 | 1.34209 | 70.053         | 5.9   |
| 13  | 0 | 1 | 7 | 1.27124 | 74.593         | 0.5   |
| 14  | 1 | 2 | 5 | 1.26260 | 75.192         | 8.7   |
| 15  | 0 | 3 | 1 | 1.25413 | 75.789         | 2.4   |
| 16  | 0 | 2 | 6 | 1.21158 | 78.956         | 0.0   |
| 17  | 0 | 0 | 8 | 1.18050 | 81.464         | 0.4   |
| 18  | 0 | 3 | 3 | 1.17404 | 82.008         | 0.6   |
| 19  | 2 | 2 | 4 | 1.16676 | 82.631         | 4.2   |
| 20  | 1 | 3 | 2 | 1.16340 | 82.922         | 1.8   |

Fig. S1. XRD peaks list as per ICSD No. 154601.

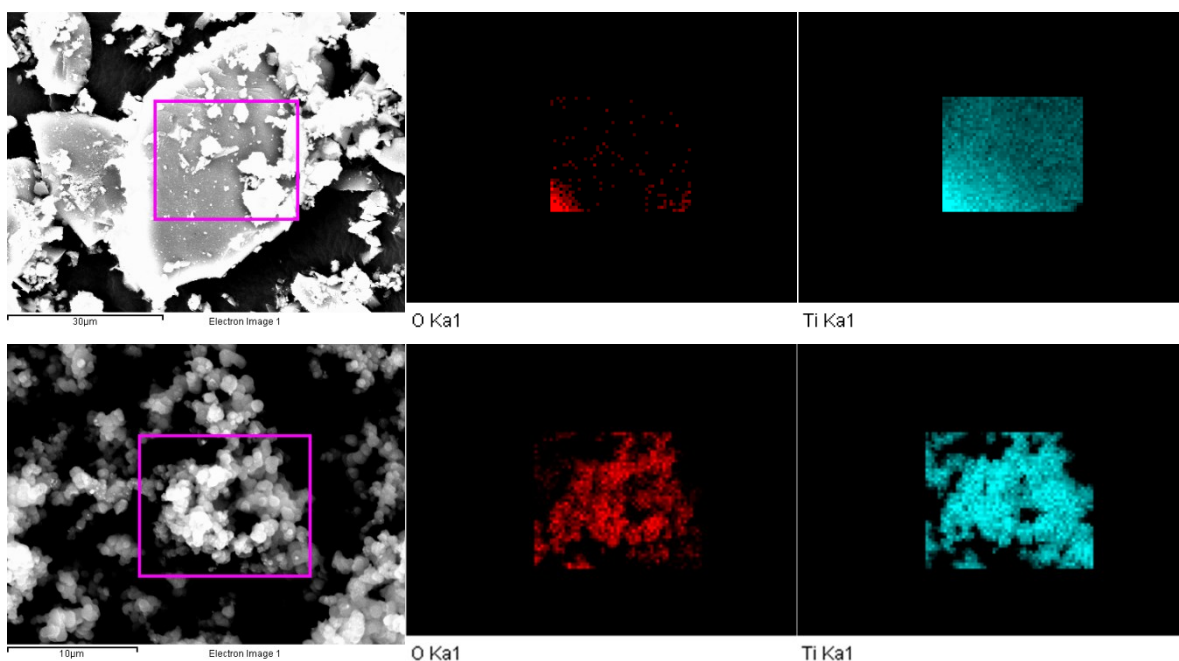

Fig. S2. EDS maps of (top row) 5MT and (bottom row) 10MT samples.

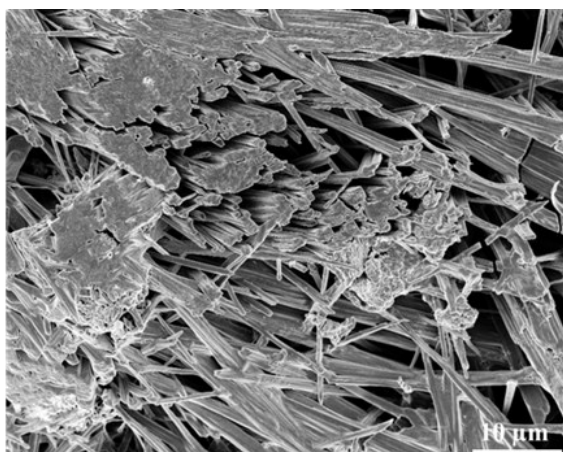

**Fig. S3.** FESEM image of the sample prepared with 5 mL of 10 M NaOH in the reaction mixture with the rest of the experimental parameters remaining the same.

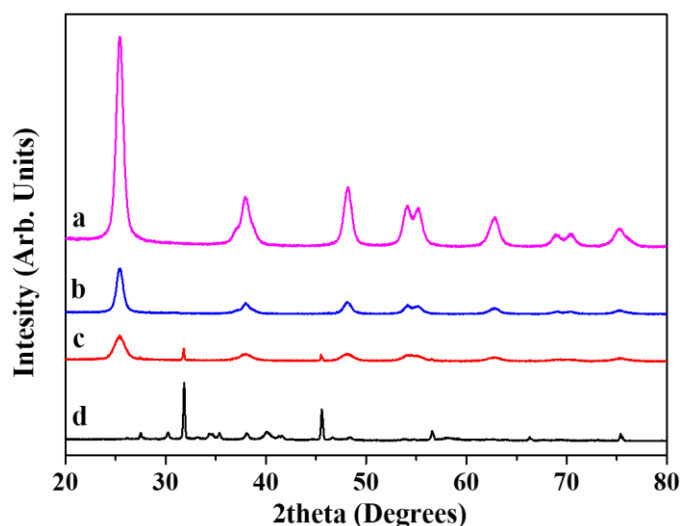

**Fig. S4.** XRD patterns of the samples prepared with a) the use of 2 mL of 10 M NaOH (the sample with flowery microsphere morphology, this XRD pattern is the same as shown in Fig. 2 for 10MT sample), b) the use of 2 mL of 10 M  $\text{NH}_4\text{OH}$  instead of 2 mL of 10 M NaOH (rest all remaining the same), c) with the use of 2 mL of 10 M NaOH but by increasing the synthesis time to 20 min (rest all remaining the same) and d) the use of 5 mL of 10 M NaOH instead of 2 mL of 10 M NaOH (rest all remaining the same).

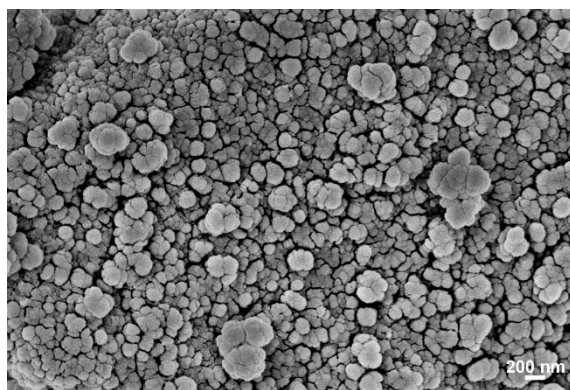

**Fig. S5.** FESEM image of the sample prepared with 2 mL of 10 M NaOH in the reaction mixture but by increasing the synthesis time to 20 min (rest all remaining the same).

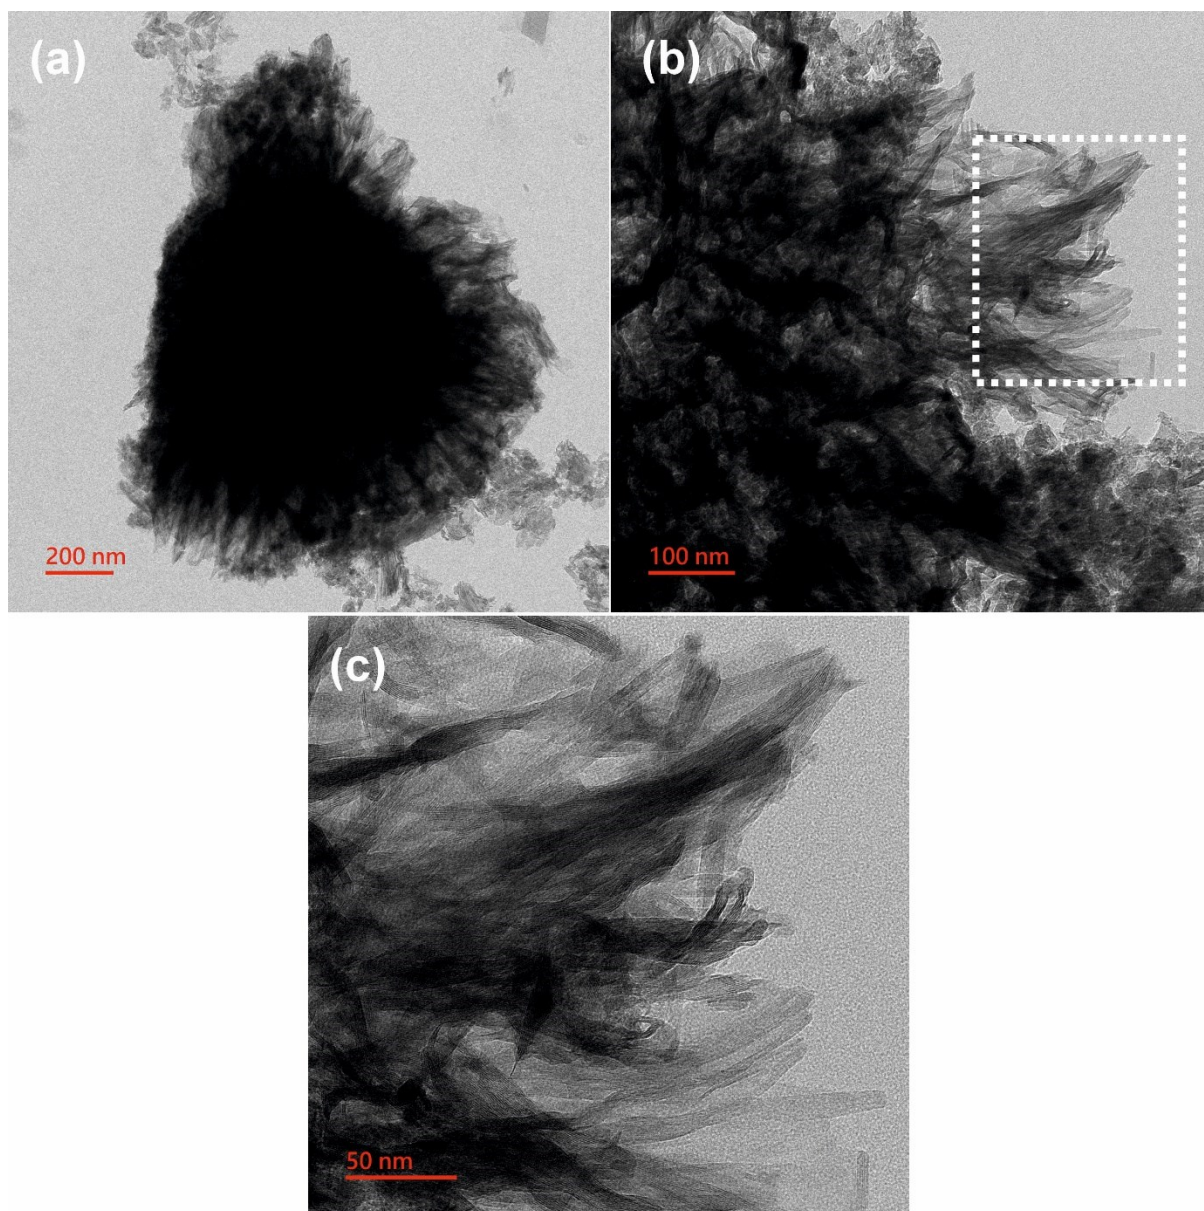

**Fig. S6.** Representative TEM images of flowery anatase-TiO<sub>2</sub> shown in Fig. 1. (c) is the magnified image of the dotted region shown in (b).



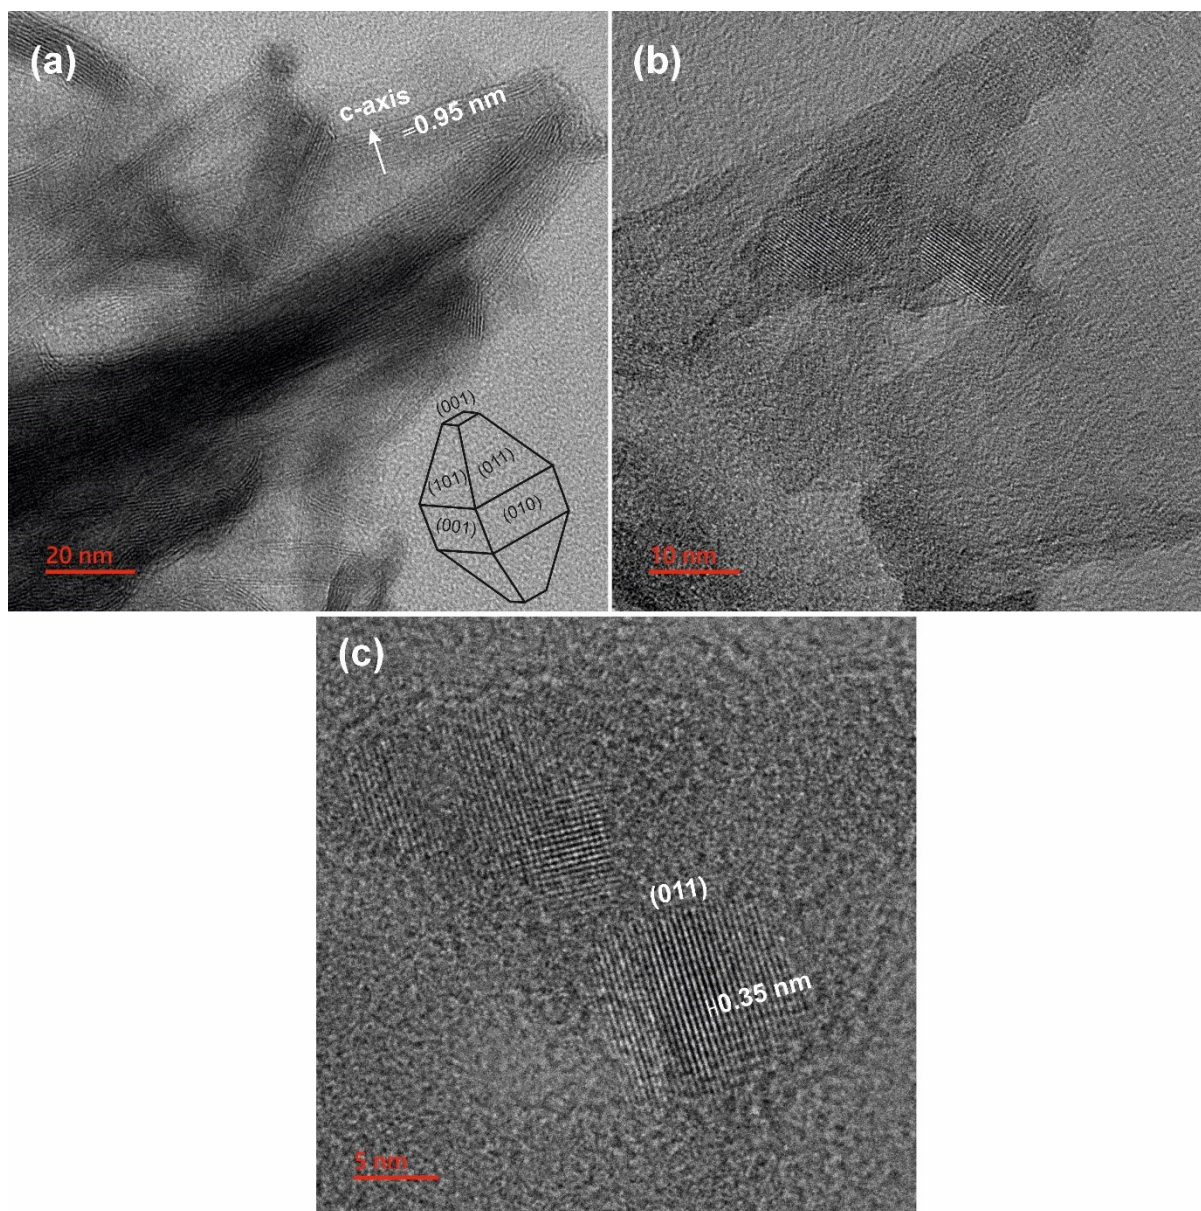

**Fig. S7.** Representative HRTEM images of flowery anatase-TiO<sub>2</sub> shown in Fig. S6.

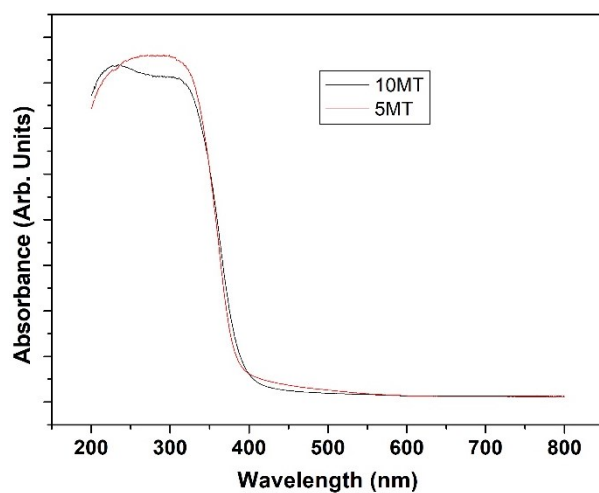

**Fig. S8.** UV-Vis spectra of 5MT and 10MT samples.

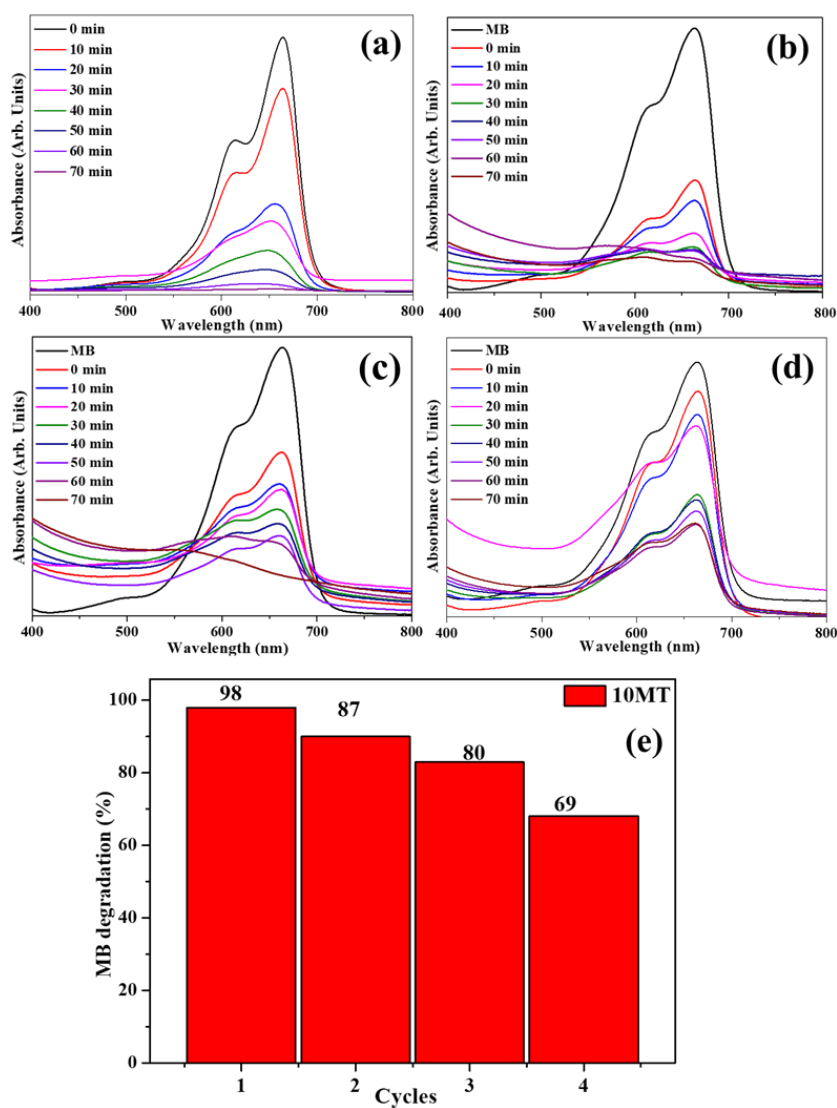

**Fig. S9.** Photodegradation of 10MT; (a) 1<sup>st</sup> cycle, (b) 2<sup>nd</sup> cycle, (c) 3<sup>rd</sup> cycle, (d) 4<sup>th</sup> cycle, and (e) efficiency of photodegradation of MB.

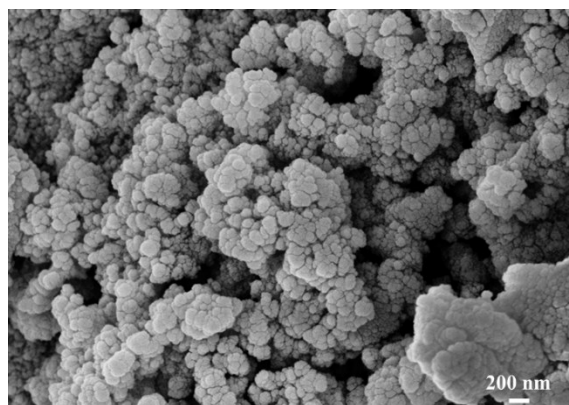

**Fig. S10.** FESEM image of the sample prepared with 2 mL of 10 M  $\text{NH}_4\text{OH}$  in the reaction mixture (rest all remaining the same).
